# Supplementary material
Source: HighWire-hosted journal article supplement (https://bmjopen.bmj.com/content/12/7/e060066)
Supplement: inline-supplementary-material-1 [file inline-supplementary-material-1.pdf]

## Supplementary 1: TREND checklist for reporting of non-randomized evaluations of behavioral and public health interventions

Darlow, B., Brown, M., McKinlay, E., Gray, L., Purdie, G., Pullon, S. (2022). Longitudinal impact of pre-registration interprofessional education on the attitudes and skills of health professionals during their early careers: a non-randomised trial with 4-year outcomes. *BMJ Open*

| Paper Section/Topic                                                 | Item No. | Descriptor                                                                                                                                                                                                                              | Reported? |      |
|---------------------------------------------------------------------|----------|-----------------------------------------------------------------------------------------------------------------------------------------------------------------------------------------------------------------------------------------|-----------|------|
|                                                                     |          |                                                                                                                                                                                                                                         | ✓         | Pg # |
| <b>TITLE and ABSTRACT</b>                                           |          |                                                                                                                                                                                                                                         |           |      |
| Title, Abstract                                                     | 1        | • Information on how units were allocated to interventions                                                                                                                                                                              | ✓         | 2    |
|                                                                     |          | • Structured abstract recommended                                                                                                                                                                                                       | ✓         | 2    |
|                                                                     |          | • Information on target population or study sample                                                                                                                                                                                      | ✓         | 2    |
| <b>INTRODUCTION</b>                                                 |          |                                                                                                                                                                                                                                         |           |      |
| Background                                                          | 2        | • Scientific background and explanation of rationale                                                                                                                                                                                    | ✓         | 4    |
|                                                                     |          | • Theories used in designing behavioral interventions                                                                                                                                                                                   | N/A       |      |
| <b>METHODS</b>                                                      |          |                                                                                                                                                                                                                                         |           |      |
| Participants                                                        | 3        | • Eligibility criteria for participants, including criteria at different levels in recruitment/sampling plan (e.g., cities, clinics, subjects)                                                                                          | ✓         | 4    |
|                                                                     |          | • Method of recruitment (e.g., referral, self-selection), including the sampling method if a systematic sampling plan was implemented                                                                                                   | ✓         | 4    |
|                                                                     |          | • Recruitment setting                                                                                                                                                                                                                   | ✓         | 4    |
|                                                                     |          | • Settings and locations where the data were collected                                                                                                                                                                                  | ✓         | 6    |
| Interventions                                                       | 4        | • Details of the interventions intended for each study condition and how and when they were actually administered, specifically including:                                                                                              | ✓         | 5    |
|                                                                     |          | ○ Content: what was given?                                                                                                                                                                                                              | ✓         | 5    |
|                                                                     |          | ○ Delivery method: how was the content given?                                                                                                                                                                                           | ✓         | 5    |
|                                                                     |          | ○ Unit of delivery: how were subjects grouped during delivery?                                                                                                                                                                          | ✓         | 5    |
|                                                                     |          | ○ Deliverer: who delivered the intervention?                                                                                                                                                                                            | ✓         | 5    |
|                                                                     |          | ○ Setting: where was the intervention delivered?                                                                                                                                                                                        | ✓         | 5    |
|                                                                     |          | ○ Exposure quantity and duration: how many sessions or episodes or events were intended to be delivered? How long were they intended to last?                                                                                           | ✓         | 5    |
|                                                                     |          | ○ Time span: how long was it intended to take to deliver the intervention to each unit?                                                                                                                                                 | ✓         | 5    |
| ○ Activities to increase compliance or adherence (e.g., incentives) | N/A      |                                                                                                                                                                                                                                         |           |      |
| Objectives                                                          | 5        | • Specific objectives and hypotheses                                                                                                                                                                                                    | ✓         | 4    |
| Outcomes                                                            | 6        | • Clearly defined primary and secondary outcome measures                                                                                                                                                                                | ✓         | 5    |
|                                                                     |          | • Methods used to collect data and any methods used to enhance the quality of measurements                                                                                                                                              | ✓         | 6    |
|                                                                     |          | • Information on validated instruments such as psychometric and biometric properties                                                                                                                                                    | ✓         | 6    |
| Sample size                                                         | 7        | • How sample size was determined and, when applicable, explanation of any interim analyses and stopping rules                                                                                                                           | ✓         | 6    |
| Assignment method                                                   | 8        | • Unit of assignment (the unit being assigned to study condition, e.g., individual, group, community)                                                                                                                                   | ✓         | 5    |
|                                                                     |          | • Method used to assign units to study conditions, including details of any restriction (e.g., blocking, stratification, minimization)                                                                                                  | ✓         | 4,5  |
|                                                                     |          | • Inclusion of aspects employed to help minimize potential bias induced due to non-randomization (e.g., matching)                                                                                                                       | NA        |      |
| Blinding (masking)                                                  | 9        | • Whether or not participants, those administering the interventions, and those assessing the outcomes were blinded to study condition assignment; if so, statement regarding how the blinding was accomplished and how it was assessed | ✓         | 4    |
| Unit of Analysis                                                    | 10       | • Description of the smallest unit that is being analysed to assess intervention effects (e.g., individual, group, or community)                                                                                                        | ✓         | 6    |
|                                                                     |          | • If the unit of analysis differs from the unit of assignment, the analytical method used to account for this (e.g., adjusting the standard error estimates by the design effect or using multilevel analysis)                          | N/A       |      |

|                         |    |                                                                                                                                                                                                                                                                                |     |         |
|-------------------------|----|--------------------------------------------------------------------------------------------------------------------------------------------------------------------------------------------------------------------------------------------------------------------------------|-----|---------|
| Statistical methods     | 11 | • Statistical methods used to compare study groups for primary methods outcome(s), including complex methods for correlated data                                                                                                                                               | ✓   | 6       |
|                         |    | • Statistical methods used for additional analyses, such as subgroup analyses and adjusted analysis                                                                                                                                                                            | ✓   | 6       |
|                         |    | • Methods for imputing missing data, if used                                                                                                                                                                                                                                   | ✓   | 6       |
|                         |    | • Statistical software or programs used                                                                                                                                                                                                                                        | ✓   | 6       |
| <b>RESULTS</b>          |    |                                                                                                                                                                                                                                                                                |     |         |
| Participant flow        | 12 | • Flow of participants through each stage of the study: enrollment, assignment, allocation and intervention exposure, follow-up, analysis (a diagram is strongly recommended)                                                                                                  | ✓   | 7, S3   |
|                         |    | ○ Enrollment: the numbers of participants screened for eligibility, found to be eligible or not eligible, declined to be enrolled, and enrolled in the study                                                                                                                   | ✓   | 7, S3   |
|                         |    | ○ Assignment: the numbers of participants assigned to a study condition                                                                                                                                                                                                        | ✓   | 7,8, S3 |
|                         |    | ○ Allocation and intervention exposure: the number of participants assigned to each study condition and the number of participants who received each intervention                                                                                                              | ✓   | 7,8, S3 |
|                         |    | ○ Follow-up: the number of participants who completed the follow-up or did not complete the follow-up (i.e., lost to follow-up), by study condition                                                                                                                            | ✓   | 9, S3   |
|                         |    | ○ Analysis: the number of participants included in or excluded from the main analysis, by study condition                                                                                                                                                                      | ✓   | 9, S3   |
|                         |    | • Description of protocol deviations from study as planned, along with reasons                                                                                                                                                                                                 | N/A |         |
| Recruitment             | 13 | • Dates defining the periods of recruitment and follow-up                                                                                                                                                                                                                      | ✓   | 4,6     |
| Baseline data           | 14 | • Baseline demographic and clinical characteristics of participants in each study condition                                                                                                                                                                                    | ✓   | 7,8     |
|                         |    | • Baseline characteristics for each study condition relevant to specific disease prevention research                                                                                                                                                                           | ✓   | 7,8     |
|                         |    | • Baseline comparisons of those lost to follow-up and those retained, overall and by study condition                                                                                                                                                                           | ✓   | 7,8     |
|                         |    | • Comparison between study population at baseline and target population of interest                                                                                                                                                                                            | ✓   | 7,8     |
| Baseline equivalence    | 15 | • Data on study group equivalence at baseline and statistical methods used to control for baseline differences                                                                                                                                                                 | ✓   | 7-9     |
| Numbers analyzed        | 16 | • Number of participants (denominator) included in each analysis for each study condition, particularly when the denominators change for different outcomes; statement of the results in absolute numbers when feasible                                                        | ✓   | S3      |
|                         |    | ✓ Indication of whether the analysis strategy was "intention to treat" or, if not, description of how non-compliers were treated in the analyses                                                                                                                               | ✓   | 7,9     |
| Outcomes and estimation | 17 | • For each primary and secondary outcome, a summary of results for each estimation study condition, and the estimated effect size and a confidence interval to indicate the precision                                                                                          | ✓   | 9       |
|                         |    | • Inclusion of null and negative findings                                                                                                                                                                                                                                      | ✓   | 9       |
|                         |    | • Inclusion of results from testing pre-specified causal pathways through which the intervention was intended to operate, if any                                                                                                                                               | N/A |         |
| Ancillary analyses      | 18 | • Summary of other analyses performed, including subgroup or restricted analyses, indicating which are pre-specified or exploratory                                                                                                                                            | N/A |         |
| Adverse events          | 19 | • Summary of all important adverse events or unintended effects in each study condition (including summary measures, effect size estimates, and confidence intervals)                                                                                                          | N/A |         |
| <b>DISCUSSION</b>       |    |                                                                                                                                                                                                                                                                                |     |         |
| Interpretation          | 20 | • Interpretation of the results, taking into account study hypotheses, sources of potential bias, imprecision of measures, multiplicative analyses, and other limitations or weaknesses of the study                                                                           | ✓   | 12, 13  |
|                         |    | • Discussion of results taking into account the mechanism by which the intervention was intended to work (causal pathways) or alternative mechanisms or explanations                                                                                                           | ✓   | 12, 13  |
|                         |    | • Discussion of the success of and barriers to implementing the intervention, fidelity of implementation                                                                                                                                                                       | N/A |         |
|                         |    | • Discussion of research, programmatic, or policy implications                                                                                                                                                                                                                 | ✓   | 12, 13  |
| Generalizability        | 21 | • Generalizability (external validity) of the trial findings, taking into account the study population, the characteristics of the intervention, length of follow-up, incentives, compliance rates, specific sites/settings involved in the study, and other contextual issues | ✓   | 12, 13  |
| Overall evidence        | 22 | • General interpretation of the results in the context of current evidence and current theory                                                                                                                                                                                  | ✓   | 12, 13  |

From: <http://www.cdc.gov/trendstatement/> Also see: <https://www.equator-network.org/reporting-guidelines/improving-the-reporting-quality-of-nonrandomized-evaluations-of-behavioral-and-public-health-interventions-the-trend-statement/>

## Supplementary 2: Longitudinal Interprofessional Study survey items

Darlow, B., Brown, M., McKinlay, E., Gray, L., Purdie, G., Pullon, S. (2022). Longitudinal impact of pre-registration interprofessional education on the attitudes and skills of health professionals during their early careers: a non-randomised trial with 4-year outcomes. *BMJ Open*

| Survey   | Components                                                                                                                                                                                                 | Stage                                                                           |
|----------|------------------------------------------------------------------------------------------------------------------------------------------------------------------------------------------------------------|---------------------------------------------------------------------------------|
| Survey 1 | ATHCTS<br>TSS<br>Demographic items                                                                                                                                                                         | Pre- the final year of training<br>(and prior to TIPE or control exposure)      |
| Survey 2 | ATHCTS<br>TSS<br>Clinical practice intention (quantitative and free text items)                                                                                                                            | Post- the final year of training<br>(and after TIPE or control exposure)        |
| Survey 3 | ATHCTS<br>TSS<br>Clinical practice characteristics (quantitative and free text items)<br>Satisfaction (quantitative and free text items)<br>Interprofessional practice (quantitative and free text items)* | One year post-graduation<br>(and end of first year of professional practice)    |
| Survey 4 | ATHCTS<br>TSS<br>Clinical practice characteristics (quantitative and free text items)<br>Satisfaction (quantitative and free text items)<br>Interprofessional practice (quantitative and free text items)* | Two years post-graduation<br>(and end of second year of professional practice)  |
| Survey 5 | ATHCTS<br>TSS<br>Clinical practice characteristics (quantitative and free text items)<br>Satisfaction (quantitative and free text items)<br>Interprofessional practice (quantitative and free text items)* | Three years post-graduation<br>(and end of third year of professional practice) |

ATHCTS, Attitudes Towards Health Care Teams Scale; TSS, Team Skills Scale; TIPE, Tairāwhiti interprofessional education programme

\* Free-text questions #3 *interprofessional practice* completed only by participants who attended the Tairāwhiti interprofessional education programme.

## Supplementary 3: Development of thematic template

Darlow, B., Brown, M., McKinlay, E., Gray, L., Purdie, G., Pullon, S. (2022). Longitudinal impact of pre-registration interprofessional education on the attitudes and skills of health professionals during their early careers: a non-randomised trial with 4-year outcomes. *BMJ Open*

**Table S1. A Priori Template for Testing a Subset of Longitudinal Interprofessional Study Data**

|                                |                                                                                                                                                                                                                                                                                                                                                                                                                                                                                                                                                                                                                                                                                                                                                                                                                                                                                                                                                                                                                                                                                                                                                                                                                                                                                                                                                                                                                                                                                                                                                                                                                                                                                                                                                                                                                            |
|--------------------------------|----------------------------------------------------------------------------------------------------------------------------------------------------------------------------------------------------------------------------------------------------------------------------------------------------------------------------------------------------------------------------------------------------------------------------------------------------------------------------------------------------------------------------------------------------------------------------------------------------------------------------------------------------------------------------------------------------------------------------------------------------------------------------------------------------------------------------------------------------------------------------------------------------------------------------------------------------------------------------------------------------------------------------------------------------------------------------------------------------------------------------------------------------------------------------------------------------------------------------------------------------------------------------------------------------------------------------------------------------------------------------------------------------------------------------------------------------------------------------------------------------------------------------------------------------------------------------------------------------------------------------------------------------------------------------------------------------------------------------------------------------------------------------------------------------------------------------|
| Free-text survey items         | <ol style="list-style-type: none"> <li>1. Explanation of response <i>'not working or training'</i></li> <li>2. Explanation of response <i>'Other health profession'</i></li> <li>3. Comments on responses to the <i>'Attitudes Towards Health Care Teams Scale'</i></li> <li>4. Comments on responses to the <i>'Team Skills Scale'</i></li> <li>5. Explanation of response <i>'Other practice setting/professional area'</i></li> <li>6. Explanation of response <i>'Other practice setting/professional area -- most of time spent'</i></li> <li>7. Explanation of response <i>'working or training in practice setting / professional area'</i></li> <li>8. Explanation of response <i>'Other location type'</i></li> <li>9. Explanation of response <i>'Other location type -- most of time spent'</i></li> <li>10. Explanation of response <i>'choosing to work in location type'</i></li> <li>11. Comments on response <i>'job and career satisfaction'</i></li> <li>12. [TIPE participants only] Comments on response <i>'function and purpose of this interprofessional team'</i></li> <li>13. [TIPE participants only] Explanation of response <i>'Other types of interprofessional team disciplines'</i></li> <li>14. [TIPE participants only] Description of response <i>'how this interprofessional team works and your role'</i></li> <li>15. [TIPE participants only] Comments on response <i>'experience of working or collaborating with different disciplines or health profession'</i></li> <li>16. [TIPE participants only] Comments on response <i>'aspects of interprofessional education that prepared you for working in interprofessional team'</i></li> <li>17. [TIPE participants only] Comments on response <i>'influence of TIPE on career choices'</i></li> <li>18. Other comments</li> </ol> |
| A priori themes and sub-themes | <p><b>All participants</b></p> <ol style="list-style-type: none"> <li>1. Current work           <ul style="list-style-type: none"> <li>• General Details               <ul style="list-style-type: none"> <li>• Reason for choosing clinical setting (Items 1, 2, 5 - 7)</li> <li>• Reason for choosing location (Items 8 - 10)</li> <li>• Job satisfaction (item 11)</li> </ul> </li> <li>• Interprofessional team in current job               <ul style="list-style-type: none"> <li>○ Function and Purpose (Item 12, 13)</li> <li>○ How it works (Item 14)</li> </ul> </li> </ul> </li> </ol> <p><b>Participants who attended TIPE</b></p> <ol style="list-style-type: none"> <li>2. Attitudes or experience regarding interprofessional teams or skills           <ul style="list-style-type: none"> <li>• Attitudes toward collaborating (Item 3)</li> <li>• Ability or experience collaborating (Items 4, 15)</li> </ul> </li> <li>3. Beliefs regarding the influence of interprofessional education           <ul style="list-style-type: none"> <li>• Pre-registration training preparation for interprofessional teams (Item 16)</li> <li>• Impact of TIPE on career (Item 17)</li> </ul> </li> </ol>                                                                                                                                                                                                                                                                                                                                                                                                                                                                                                                                                                                                            |

TIPE, Tairāwhiti Interprofessional Education program

**Table S2. Initial Template (V1) for Coding the Longitudinal Interprofessional Study Full Dataset (all levels of codes)**

|                                                      |                                                                                                                                                                                                                                                                                                                                                                                                                                                                                                                                                                                                                                                                                                                                                                                                                                                                                                                                                                                                                                                                                                                                      |
|------------------------------------------------------|--------------------------------------------------------------------------------------------------------------------------------------------------------------------------------------------------------------------------------------------------------------------------------------------------------------------------------------------------------------------------------------------------------------------------------------------------------------------------------------------------------------------------------------------------------------------------------------------------------------------------------------------------------------------------------------------------------------------------------------------------------------------------------------------------------------------------------------------------------------------------------------------------------------------------------------------------------------------------------------------------------------------------------------------------------------------------------------------------------------------------------------|
| Initial themes and sub-themes                        | <p><b>All participants</b></p> <ol style="list-style-type: none"> <li>1. To be coded (free node)</li> <li>2. Doing for work <ul style="list-style-type: none"> <li>• Reason for choosing Clinical Setting <ul style="list-style-type: none"> <li>• Job Reasons</li> <li>• Personal Reasons</li> </ul> </li> <li>• Reason for choosing Location <ul style="list-style-type: none"> <li>• Job Reasons</li> <li>• Personal Reasons</li> </ul> </li> <li>• Job Satisfaction <ul style="list-style-type: none"> <li>• Satisfied</li> <li>• Dissatisfied</li> </ul> </li> </ul> </li> </ol> <p><b>Participants who attended TIPE</b></p> <ol style="list-style-type: none"> <li>3. Attitudes or experience regarding interprofessional teams or skills <ul style="list-style-type: none"> <li>• Ability or experience collaborating</li> <li>• Attitudes toward collaborating</li> </ul> </li> <li>4. Beliefs regarding the influence of interprofessional education <ul style="list-style-type: none"> <li>• Pre-registration training preparation for interprofessional teams</li> <li>• TIPE influence on career</li> </ul> </li> </ol> |
| Free-text items not coded (descriptive-only answers) | <ol style="list-style-type: none"> <li>1. Interprofessional team in current job (Items 12 - 14) <ul style="list-style-type: none"> <li>• Function and Purpose</li> <li>• How it works</li> </ul> </li> </ol>                                                                                                                                                                                                                                                                                                                                                                                                                                                                                                                                                                                                                                                                                                                                                                                                                                                                                                                         |

TIPE, Tairāwhiti Interprofessional Education program

**Table S3. Final Themes and Sub-themes in the Longitudinal Interprofessional Study (higher-level codes only)**

| Themes (Level 1)                                                               | Sub-themes (including higher-level codes only)*                                                                                                                                                                                                                                                                                                                                                                                                                                                                                                                                                                                                                                                                                                                                                                                                                                                                                                                                                                                                                                                                                              |
|--------------------------------------------------------------------------------|----------------------------------------------------------------------------------------------------------------------------------------------------------------------------------------------------------------------------------------------------------------------------------------------------------------------------------------------------------------------------------------------------------------------------------------------------------------------------------------------------------------------------------------------------------------------------------------------------------------------------------------------------------------------------------------------------------------------------------------------------------------------------------------------------------------------------------------------------------------------------------------------------------------------------------------------------------------------------------------------------------------------------------------------------------------------------------------------------------------------------------------------|
| Theme 1:<br>Current Work                                                       | <ol style="list-style-type: none"> <li><b>1. Reason for choosing clinical setting</b> <ul style="list-style-type: none"> <li>• <i>Job Reasons</i> <ul style="list-style-type: none"> <li>○ Requirement for career path</li> <li>○ Availability of job or opportunities</li> <li>○ Nature of the job</li> </ul> </li> <li>• <i>Personal Reasons</i> <ul style="list-style-type: none"> <li>○ Family</li> <li>○ Partner</li> <li>○ Friends</li> </ul> </li> </ul> </li> <li><b>2. Reason for choosing location</b> <ul style="list-style-type: none"> <li>• <i>Job Reasons</i> <ul style="list-style-type: none"> <li>○ Requirement for career path</li> <li>○ Availability of job or opportunities</li> <li>○ Nature of the job</li> </ul> </li> <li>• <i>'Nature of the Location' Reasons</i></li> <li>• <i>Personal Reasons</i> <ul style="list-style-type: none"> <li>○ Home, where I live</li> <li>○ Family</li> <li>○ Partner</li> <li>○ Friends</li> </ul> </li> </ul> </li> <li><b>3. Job satisfaction</b> <ul style="list-style-type: none"> <li>• [Coded, but results not reported due to low response rates]</li> </ul> </li> </ol> |
| Theme 2:<br>Attitudes/experiences related to interprofessional teams or skills | <ul style="list-style-type: none"> <li>• <i>Benefits of working in interprofessional teams or collaboration</i></li> <li>• <i>Varies: challenges of working in interprofessional teams or collaboration</i></li> <li>• <i>Health practitioner interaction but not part of team</i></li> </ul>                                                                                                                                                                                                                                                                                                                                                                                                                                                                                                                                                                                                                                                                                                                                                                                                                                                |
| Theme 3: Influence of interprofessional education                              | <ol style="list-style-type: none"> <li><b>1. Pre-registration preparation for working in interprofessional teams</b> <ul style="list-style-type: none"> <li>• <i>Participated in interprofessional education</i></li> <li>• <i>Choice of clinical setting</i></li> <li>• <i>Collaboration and teamwork</i></li> <li>• <i>Hit the ground running</i></li> </ul> </li> <li><b>2. Influence of TIPE on career</b> <ul style="list-style-type: none"> <li>• <i>Choice of clinical setting</i></li> <li>• <i>Choice of location</i></li> <li>• <i>The way I do my job</i></li> <li>• <i>No influence</i></li> </ul> </li> </ol>                                                                                                                                                                                                                                                                                                                                                                                                                                                                                                                   |

Note. Detailed lower-level codes ( $\geq$  level 5) are reported elsewhere (manuscript of results in review). TIPE, Tairāwhiti Interprofessional Education program

## Supplementary 4: Participant flowchart and additional analyses

Darlow, B., Brown, M., McKinlay, E., Gray, L., Purdie, G., Pullon, S. (2022). Longitudinal impact of pre-registration interprofessional education on the attitudes and skills of health professionals during their early careers: a non-randomised trial with 4-year outcomes. *BMJ Open*

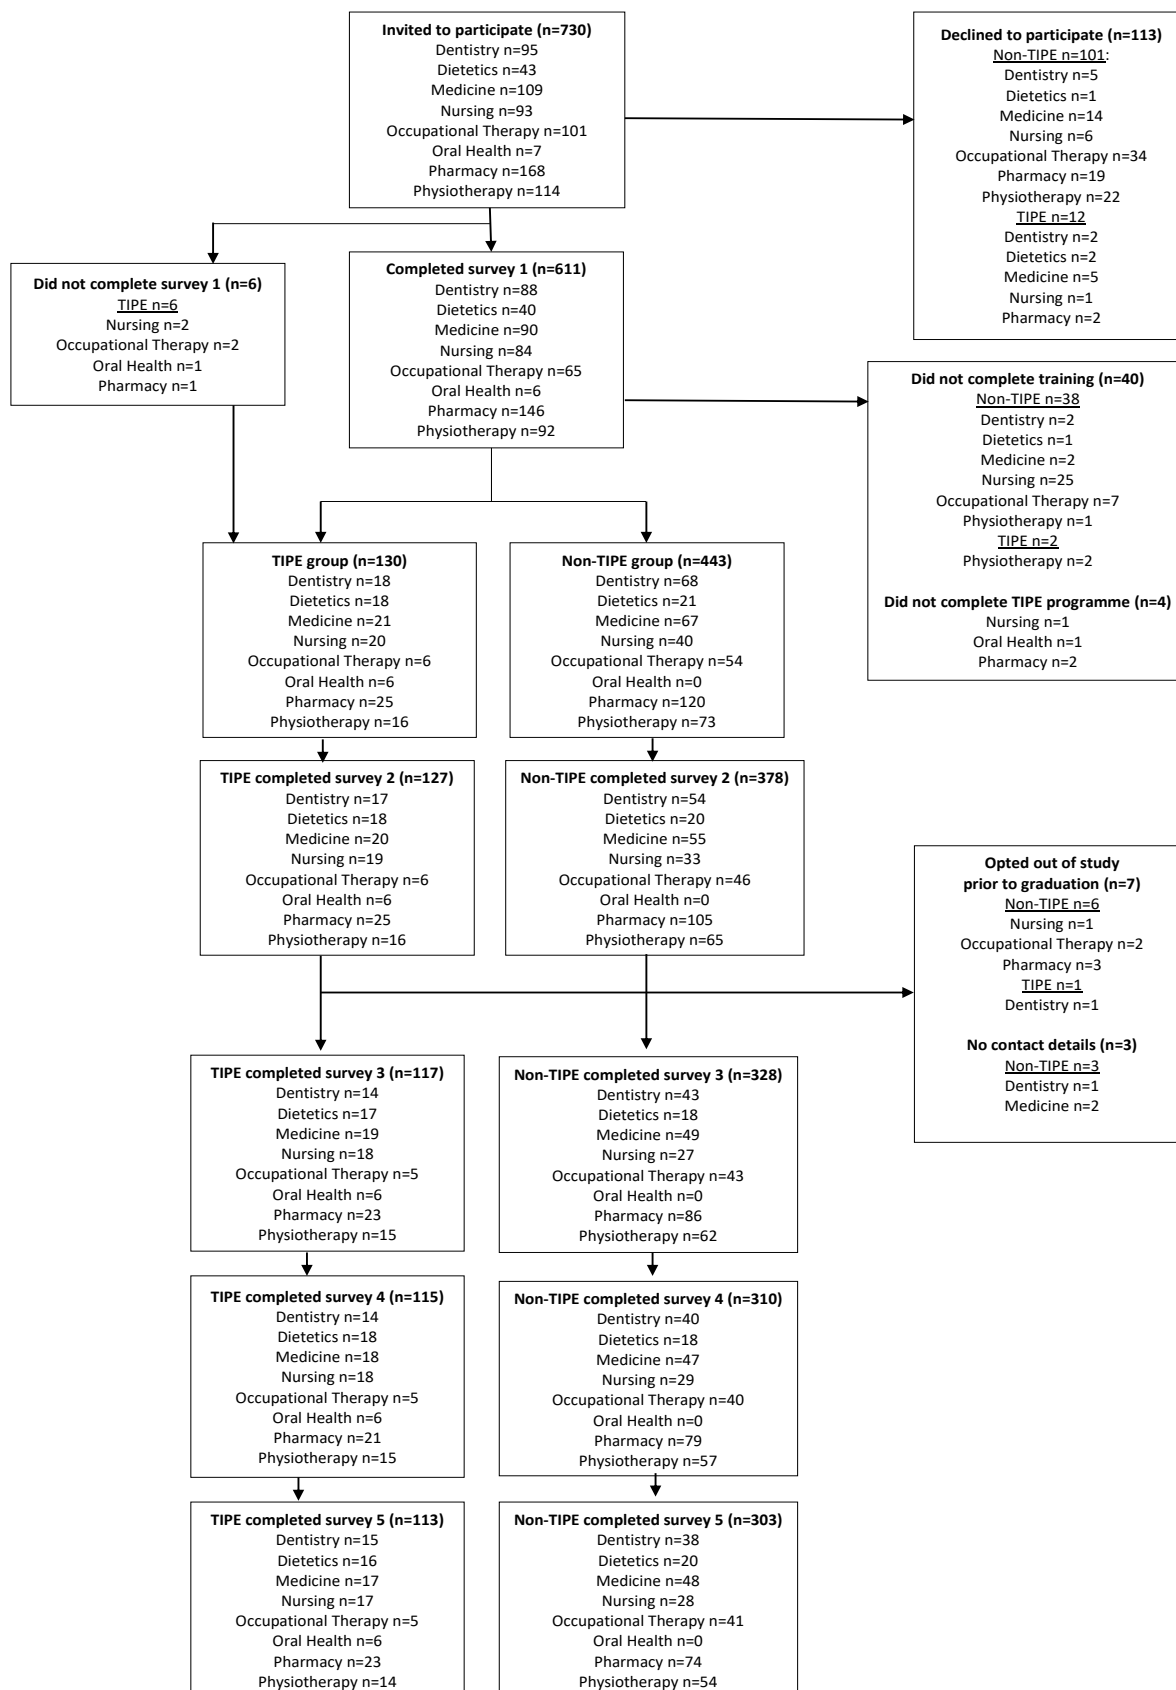

Figure S1. Participant flow. TIPE = Tairāwhiti Interprofessional Education programme

## Response rates and loss to follow-up

Table S1. Survey 1 (baseline) response rates

| Cohort and discipline | Invited | Completed survey | Response rate % |
|-----------------------|---------|------------------|-----------------|
| <b>Non-TIPE</b>       |         |                  |                 |
| Dentistry             | 75      | 70               | 93%             |
| Dietetics             | 23      | 22               | 96%             |
| Medicine              | 83      | 69               | 83%             |
| Nursing               | 71      | 65               | 92%             |
| Occupational Therapy  | 95      | 61               | 64%             |
| Oral Health           | 0       | 0                | -               |
| Pharmacy              | 139     | 120              | 86%             |
| Physiotherapy         | 96      | 74               | 77%             |
| Total                 | 582     | 481              | 83%             |
| <b>TIPE Cohort 1</b>  |         |                  |                 |
| Dentistry             | 10      | 9                | 90%             |
| Dietetics             | 10      | 8                | 80%             |
| Medicine              | 15      | 12               | 80%             |
| Nursing               | 10      | 10               | 100%            |
| Occupational Therapy  | 2       | 2                | 100%            |
| Oral Health           | 0       | 0                |                 |
| Pharmacy              | 14      | 12               | 86%             |
| Physiotherapy         | 6       | 6                | 100%            |
| Total                 | 67      | 59               | 88%             |
| <b>TIPE Cohort 2</b>  |         |                  |                 |
| Dentistry             | 10      | 9                | 90%             |
| Dietetics             | 10      | 10               | 100%            |
| Medicine              | 11      | 9                | 82%             |
| Nursing               | 9       | 8                | 89%             |
| Occupational Therapy  | 2       | 2                | 100%            |
| Oral Health           | 5       | 5                | 100%            |
| Pharmacy              | 12      | 12               | 100%            |
| Physiotherapy         | 10      | 10               | 100%            |
| Total                 | 69      | 65               | 94%             |

TIPE = Tairāwhiti Interprofessional Education programme



**Table S2. Survey 2 (graduation) response rates**

| <b>Cohort and discipline</b> | <b>Invited</b> | <b>Completed survey</b> | <b>Response rate %</b> |
|------------------------------|----------------|-------------------------|------------------------|
| <b>Non-TIPE</b>              |                |                         |                        |
| Dentistry                    | 68             | 54                      | 79%                    |
| Dietetics                    | 21             | 20                      | 95%                    |
| Medicine                     | 67             | 55                      | 82%                    |
| Nursing                      | 40             | 33                      | 83%                    |
| Occupational Therapy         | 54             | 46                      | 85%                    |
| Oral Health                  | 0              | 0                       |                        |
| Pharmacy                     | 120            | 105                     | 88%                    |
| Physiotherapy                | 73             | 65                      | 89%                    |
| Total                        | 443            | 378                     | 85%                    |
| <b>TIPE Cohort 1</b>         |                |                         |                        |
| Dentistry                    | 9              | 8                       | 89%                    |
| Dietetics                    | 8              | 8                       | 100%                   |
| Medicine                     | 12             | 11                      | 92%                    |
| Nursing                      | 10             | 10                      | 100%                   |
| Occupational Therapy         | 2              | 2                       | 100%                   |
| Oral Health                  | 0              | 0                       |                        |
| Pharmacy                     | 12             | 12                      | 100%                   |
| Physiotherapy                | 6              | 6                       | 100%                   |
| Total                        | 59             | 57                      | 97%                    |
| <b>TIPE Cohort 2</b>         |                |                         |                        |
| Dentistry                    | 9              | 9                       | 100%                   |
| Dietetics                    | 10             | 10                      | 100%                   |
| Medicine                     | 9              | 9                       | 100%                   |
| Nursing                      | 10             | 9                       | 90%                    |
| Occupational Therapy         | 4              | 4                       | 100%                   |
| Oral Health                  | 6              | 6                       | 100%                   |
| Pharmacy                     | 13             | 13                      | 100%                   |
| Physiotherapy                | 10             | 10                      | 100%                   |
| Total                        | 71             | 70                      | 99%                    |

TIPE = Tairāwhiti Interprofessional Education programme

**Table S3. Survey 3 (end of first year of clinical practice) response rates**

| Cohort and discipline | Invited | Completed survey | Response rate % |
|-----------------------|---------|------------------|-----------------|
| <b>Non-TIPE</b>       |         |                  |                 |
| Dentistry             | 66      | 42               | 64%             |
| Dietetics             | 21      | 18               | 86%             |
| Medicine              | 66      | 48               | 73%             |
| Nursing               | 40      | 27               | 68%             |
| Occupational Therapy  | 54      | 43               | 80%             |
| Oral Health           | 0       | 0                |                 |
| Pharmacy              | 117     | 84               | 72%             |
| Physiotherapy         | 69      | 58               | 84%             |
| Total                 | 433     | 320              | 74%             |
| <b>TIPE Cohort 1</b>  |         |                  |                 |
| Dentistry             | 9       | 6                | 67%             |
| Dietetics             | 8       | 7                | 88%             |
| Medicine              | 12      | 10               | 83%             |
| Nursing               | 10      | 9                | 90%             |
| Occupational Therapy  | 2       | 2                | 100%            |
| Oral Health           | 0       | 0                |                 |
| Pharmacy              | 12      | 11               | 92%             |
| Physiotherapy         | 6       | 6                | 100%            |
| Total                 | 59      | 51               | 86%             |
| <b>TIPE Cohort 2</b>  |         |                  |                 |
| Dentistry             | 9       | 8                | 89%             |
| Dietetics             | 10      | 10               | 100%            |
| Medicine              | 9       | 9                | 100%            |
| Nursing               | 10      | 9                | 90%             |
| Occupational Therapy  | 4       | 3                | 75%             |
| Oral Health           | 6       | 6                | 100%            |
| Pharmacy              | 13      | 12               | 92%             |
| Physiotherapy         | 10      | 9                | 90%             |
| Total                 | 71      | 66               | 93%             |

TIPE = Tairāwhiti Interprofessional Education programme

**Table S4. Survey 4 (end of second year of clinical practice) response rates**

| Cohort and discipline | Invited | Completed survey | Response rate % |
|-----------------------|---------|------------------|-----------------|
| <b>Non-TIPE</b>       |         |                  |                 |
| Dentistry             | 66      | 40               | 61%             |
| Dietetics             | 21      | 18               | 86%             |
| Medicine              | 66      | 46               | 70%             |
| Nursing               | 40      | 29               | 73%             |
| Occupational Therapy  | 54      | 40               | 74%             |
| Oral Health           | 0       | 0                |                 |
| Pharmacy              | 117     | 78               | 67%             |
| Physiotherapy         | 69      | 54               | 78%             |
| Total                 | 433     | 305              | 70%             |
| <b>TIPE Cohort 1</b>  |         |                  |                 |
| Dentistry             | 9       | 7                | 78%             |
| Dietetics             | 8       | 8                | 100%            |
| Medicine              | 12      | 10               | 83%             |
| Nursing               | 10      | 9                | 90%             |
| Occupational Therapy  | 2       | 2                | 100%            |
| Oral Health           | 0       | 0                |                 |
| Pharmacy              | 12      | 10               | 83%             |
| Physiotherapy         | 6       | 6                | 100%            |
| Total                 | 59      | 52               | 88%             |
| <b>TIPE Cohort 2</b>  |         |                  |                 |
| Dentistry             | 9       | 7                | 78%             |
| Dietetics             | 10      | 10               | 100%            |
| Medicine              | 9       | 8                | 89%             |
| Nursing               | 10      | 9                | 90%             |
| Occupational Therapy  | 4       | 3                | 75%             |
| Oral Health           | 6       | 6                | 100%            |
| Pharmacy              | 13      | 11               | 85%             |
| Physiotherapy         | 10      | 9                | 90%             |
| Total                 | 71      | 63               | 89%             |

TIPE = Tairāwhiti Interprofessional Education programme

**Table S5. Survey 5 (end of third year of clinical practice) response rates**

| Cohort and discipline | Invited | Completed survey | Response rate % |
|-----------------------|---------|------------------|-----------------|
| <b>Non-TIPE</b>       |         |                  |                 |
| Dentistry             | 66      | 38               | 58%             |
| Dietetics             | 21      | 20               | 95%             |
| Medicine              | 66      | 47               | 71%             |
| Nursing               | 40      | 28               | 70%             |
| Occupational Therapy  | 54      | 41               | 76%             |
| Oral Health           | 0       | 0                |                 |
| Pharmacy              | 117     | 73               | 62%             |
| Physiotherapy         | 69      | 51               | 74%             |
| Total                 | 433     | 298              | 69%             |
| <b>TIPE Cohort 1</b>  |         |                  |                 |
| Dentistry             | 9       | 7                | 78%             |
| Dietetics             | 8       | 7                | 88%             |
| Medicine              | 12      | 10               | 83%             |
| Nursing               | 10      | 9                | 90%             |
| Occupational Therapy  | 2       | 2                | 100%            |
| Oral Health           | 0       | 0                |                 |
| Pharmacy              | 12      | 11               | 92%             |
| Physiotherapy         | 6       | 6                | 100%            |
| Total                 | 59      | 52               | 88%             |
| <b>TIPE Cohort 2</b>  |         |                  |                 |
| Dentistry             | 9       | 8                | 89%             |
| Dietetics             | 10      | 9                | 90%             |
| Medicine              | 9       | 7                | 78%             |
| Nursing               | 10      | 8                | 80%             |
| Occupational Therapy  | 4       | 3                | 75%             |
| Oral Health           | 6       | 6                | 100%            |
| Pharmacy              | 13      | 12               | 92%             |
| Physiotherapy         | 10      | 8                | 80%             |
| Total                 | 71      | 61               | 86%             |

TIPE = Tairāwhiti Interprofessional Education programme

**Table S6. Baseline characteristics of participants who completed survey 5 and those did not complete survey 5 (lost to follow-up)**

|                           | Lost to follow-up<br>(n=157) | Non lost to follow-up<br>(n=416) | Total<br>(n=573)  | p        |
|---------------------------|------------------------------|----------------------------------|-------------------|----------|
| Discipline                |                              |                                  |                   | 0.009*   |
| Dentistry                 | 21.0% (33)                   | 12.7% (53)                       | 15.0% (86)        |          |
| Dietetics                 | 1.9% (3)                     | 8.7% (36)                        | 6.8% (39)         |          |
| Nursing                   | 9.6% (15)                    | 10.8% (45)                       | 10.5% (60)        |          |
| Medicine                  | 14.6% (23)                   | 15.6% (65)                       | 15.4% (88)        |          |
| Pharmacy                  | 30.6% (48)                   | 23.3% (97)                       | 25.3% (145)       |          |
| Physiotherapy             | 13.4% (21)                   | 16.3% (68)                       | 15.5% (89)        |          |
| Occupational<br>Therapy   | 8.9% (14)                    | 11.1% (46)                       | 10.5% (60)        |          |
| Oral Health               | 0.0% (0)                     | 1.4% (6)                         | 1.0% (6)          |          |
| Female                    | 61.1% (96/157)               | 73.6% (301/409)                  | 70.1% (397/566)   | 0.004*   |
| Age                       | 22 (21–24) N=156             | 22 (21–24) N=410                 | 22 (21–24) N=566  | 0.69†    |
| NZ European               | 38.5% (60/156)               | 62.8% (257/409)                  | 56.1% (317/565)   | <0.0001* |
| Maori                     | 3.8% (6/156)                 | 8.6% (35/409)                    | 7.3% (41/565)     | 0.054*   |
| Pacific                   | 1.3% (2/156)                 | 1.2% (5/409)                     | 1.2% (7/565)      | 1.00*    |
| Chinese                   | 19.9% (31/156)               | 15.4% (63/409)                   | 16.6% (94/565)    | 0.20*    |
| Indian                    | 5.8% (9/156)                 | 4.6% (19/409)                    | 5.0% (28/565)     | 0.58*    |
| Other                     | 32.7% (51/156)               | 16.6% (68/409)                   | 21.1% (119/565)   | <0.0001* |
| Previous location         |                              |                                  |                   | 0.51*    |
| Major urban city          | 43.9% (68/155)               | 45.5% (185/407)                  | 45.0% (253/562)   |          |
| Regional city             | 26.5% (41/155)               | 29.2% (119/407)                  | 28.5% (160/562)   |          |
| Small town                | 19.4% (30/155)               | 14.3% (58/407)                   | 15.7% (88/562)    |          |
| Very small<br>town/remote | 10.3% (16/155)               | 11.1% (45/407)                   | 10.9% (61/562)    |          |
| ATHCTS                    | 52.4 (5.3) N=154             | 54.3 (5.3) N=404                 | 53.8 (5.3) N=558  | 0.0002‡  |
| TSS                       | 55.8 (11.7) N=150            | 54.1 (11.6) N=396                | 54.6 (11.7) N=546 | 0.13‡    |
| TIPE                      | 10.8% (17)                   | 27.2% (113)                      | 22.7% (130)       | <0.0001* |

\* Chi-squared test

† Wilcoxon rank sum test

‡ T-test

**Table S7. ATHCTS and TSS scores compared between Surveys 1 and 2 for TIPE and non-TIPE students**

| Score  | Difference               |          | n   | Baseline mean (SE) | Survey 2 mean (SE) | Difference (95%CI) | p       |
|--------|--------------------------|----------|-----|--------------------|--------------------|--------------------|---------|
| ATHCTS | ATHCTS - ATHCTS baseline | Non-TIPE | 364 | 53.7 (0.3)         | 55.3 (0.3)         | 1.6 (1.0 to 2.2)   | <0.0001 |
| ATHCTS | ATHCTS - ATHCTS baseline | TIPE     | 118 | 55.4 (0.5)         | 58.2 (0.5)         | 2.8 (1.8 to 3.8)   | <0.0001 |
| TSS    | TSS - TSS baseline       | Non-TIPE | 361 | 54.7 (0.6)         | 56.2 (0.6)         | 1.4 (0.3 to 2.5)   | 0.010   |
| TSS    | TSS - TSS baseline       | TIPE     | 117 | 53.6 (1.2)         | 59.5 (1.0)         | 6.0 (3.7 to 8.3)   | <0.0001 |

ATHCTS, Attitudes Towards Health Care Teams Scale. TSS, Team Skills Scale. TIPE, Tairāwhiti Interprofessional Education Programme.

**Table S8. Attitudes to Health Care Teams Scale scores at each time point for cohort 1, cohort 2 and combined TIPE, non-TIPE students and each disciplinary group**

| Cohort               | ATHCTS Survey 1 |                   | ATHCTS Survey 2 |                   | ATHCTS Survey 3 |                   | ATHCTS Survey 4 |                   | ATHCTS Survey 5 |                   |
|----------------------|-----------------|-------------------|-----------------|-------------------|-----------------|-------------------|-----------------|-------------------|-----------------|-------------------|
|                      | n               | mean (95% CI)     | n               | mean (95% CI)     | n               | mean (95% CI)     | n               | mean (95% CI)     | n               | mean (95% CI)     |
| TIPE Cohort 1        | 57              | 55.1 (53.7, 56.5) | 56              | 57.3 (55.7, 59.0) | 47              | 56.4 (54.6, 58.2) | 51              | 56.5 (55.0, 58.1) | 48              | 57.6 (56.0, 59.1) |
| TIPE Cohort 2        | 65              | 55.5 (54.3, 56.7) | 70              | 59.0 (57.6, 60.3) | 65              | 57.3 (55.8, 58.7) | 59              | 57.4 (55.9, 58.9) | 57              | 56.9 (55.4, 58.3) |
| TIPE                 | 122             | 55.3 (54.4, 56.2) | 126             | 58.2 (57.2, 59.3) | 112             | 56.9 (55.8, 58.0) | 110             | 57.0 (55.9, 58.0) | 105             | 57.2 (56.1, 58.2) |
| Non-TIPE             | 436             | 53.3 (52.8, 53.8) | 370             | 55.4 (54.8, 55.9) | 308             | 54.6 (53.9, 55.3) | 301             | 54.7 (54.1, 55.4) | 283             | 55.4 (54.7, 56.2) |
| Dentistry            | 85              | 50.9 (49.8, 52.0) | 69              | 52.8 (51.4, 54.1) | 57              | 51.6 (50.1, 53.1) | 54              | 51.8 (50.4, 53.2) | 53              | 52.2 (50.3, 54.1) |
| Dietetics            | 39              | 54.9 (53.4, 56.4) | 37              | 58.5 (56.7, 60.2) | 31              | 57.8 (55.9, 59.8) | 32              | 57.3 (55.1, 59.5) | 33              | 57.3 (55.3, 59.3) |
| Medicine             | 86              | 54.0 (52.7, 55.3) | 74              | 56.3 (55.1, 57.5) | 68              | 56.3 (55.0, 57.6) | 64              | 56.8 (55.2, 58.3) | 58              | 57.8 (56.1, 59.5) |
| Nursing              | 57              | 56.4 (54.9, 57.8) | 51              | 57.6 (56.1, 59.1) | 43              | 56.6 (55.2, 58.0) | 46              | 56.3 (54.8, 57.9) | 44              | 56.9 (55.4, 58.4) |
| Occupational Therapy | 58              | 54.1 (52.9, 55.3) | 50              | 55.0 (52.8, 57.1) | 41              | 57.0 (55.2, 58.8) | 40              | 56.8 (55.1, 58.4) | 40              | 56.3 (54.5, 58.1) |
| Oral Health          | 5               | 52.6 (46.5, 58.7) | 6               | 56.8 (54.1, 59.5) | 6               | 54.3 (48.1, 60.5) | 6               | 54.0 (50.6, 57.4) | 6               | 54.7 (51.9, 57.5) |
| Pharmacy             | 142             | 53.7 (52.9, 54.6) | 128             | 56.0 (55.1, 56.9) | 98              | 54.6 (53.3, 55.9) | 98              | 54.2 (53.2, 55.2) | 90              | 55.5 (54.2, 56.7) |
| Physiotherapy        | 86              | 54.1 (53.0, 55.2) | 81              | 57.6 (56.3, 58.8) | 76              | 55.1 (53.6, 56.5) | 71              | 56.1 (54.6, 57.6) | 64              | 56.4 (54.7, 58.1) |

ATHCTS, Attitudes Towards Health Care Teams Scale; TIPE, Tairāwhiti Interprofessional Education programme

**Table S9. Team Skills Scale scores at each time point for cohort 1, cohort 2 and combined TIPE, non-TIPE students and each disciplinary group**

| Cohort               | TSS Survey 1 |                   | TSS Survey 2 |                   | TSS Survey 3 |                   | TSS Survey 4 |                   | TSS Survey 5 |                   |
|----------------------|--------------|-------------------|--------------|-------------------|--------------|-------------------|--------------|-------------------|--------------|-------------------|
|                      | n            | mean (95% CI)     | n            | mean (95% CI)     | n            | mean (95% CI)     | n            | mean (95% CI)     | n            | mean (95% CI)     |
| TIPE Cohort 1        | 57           | 55.1 (51.4, 58.8) | 57           | 59.2 (56.2, 62.1) | 47           | 55.2 (52.6, 57.9) | 51           | 57.5 (55.0, 59.9) | 48           | 60.1 (57.1, 63.0) |
| TIPE Cohort 2        | 63           | 52.6 (49.6, 55.5) | 70           | 60.3 (57.7, 62.8) | 64           | 57.8 (55.3, 60.4) | 56           | 59.9 (57.1, 62.7) | 56           | 59.2 (56.5, 61.9) |
| TIPE                 | 120          | 53.8 (51.5, 56.1) | 127          | 59.8 (57.9, 61.7) | 111          | 56.7 (54.9, 58.6) | 107          | 58.7 (56.9, 60.6) | 104          | 59.6 (57.6, 61.5) |
| Non-TIPE             | 426          | 54.8 (53.8, 55.9) | 372          | 56.4 (55.3, 57.5) | 305          | 55.6 (54.4, 56.7) | 299          | 57.2 (56.0, 58.4) | 283          | 58.3 (57.1, 59.4) |
| Dentistry            | 86           | 57.0 (54.7, 59.2) | 70           | 55.9 (53.7, 58.0) | 57           | 53.1 (50.8, 55.4) | 52           | 53.9 (51.6, 56.2) | 53           | 56.2 (53.1, 59.2) |
| Dietetics            | 37           | 47.5 (44.0, 51.0) | 38           | 57.5 (54.6, 60.3) | 31           | 54.3 (50.9, 57.7) | 32           | 59.3 (56.0, 62.5) | 32           | 59.5 (56.0, 63.0) |
| Medicine             | 84           | 49.9 (47.5, 52.3) | 75           | 53.9 (51.5, 56.3) | 68           | 55.6 (53.5, 57.8) | 64           | 57.1 (54.7, 59.4) | 58           | 57.8 (55.6, 60.0) |
| Nursing              | 54           | 63.9 (61.1, 66.7) | 52           | 63.6 (61.0, 66.1) | 43           | 61.7 (59.0, 64.5) | 46           | 62.4 (59.6, 65.1) | 43           | 63.3 (60.4, 66.2) |
| Occupational Therapy | 53           | 54.6 (51.4, 57.8) | 50           | 59.9 (56.7, 63.1) | 41           | 58.2 (54.9, 61.5) | 40           | 61.9 (58.2, 65.7) | 40           | 60.8 (57.7, 63.9) |
| Oral Health          | 4            | 51.3 (31.1, 71.4) | 6            | 58.2 (40.7, 75.7) | 6            | 52.0 (37.0, 67.0) | 6            | 52.5 (37.2, 67.8) | 6            | 52.3 (39.7, 65.0) |
| Pharmacy             | 140          | 53.7 (51.8, 55.6) | 128          | 56.6 (54.4, 58.8) | 95           | 55.1 (52.8, 57.3) | 95           | 54.8 (52.6, 57.0) | 90           | 56.7 (54.5, 58.8) |
| Physiotherapy        | 88           | 55.6 (53.3, 58.0) | 80           | 56.7 (54.5, 58.9) | 75           | 55.5 (53.1, 57.9) | 71           | 58.7 (56.4, 61.0) | 65           | 59.9 (57.6, 62.2) |

TSS, Team Skills Scale; TIPE, Tairāwhiti Interprofessional Education programme



**Table S10. Attitudes to Health Care Teams Scale scores: collected data and multiple imputation including variables in the analysis model and demographic variables**

|                                                   | Collected data                     | Multiple imputation                |
|---------------------------------------------------|------------------------------------|------------------------------------|
| Number of Observations Used                       | 1598                               | 2292                               |
| Survey                                            | F=5.32 d.f.=3,1156 p=0.001         | F=3.43 d.f.=3,26749 p=0.016        |
| TIPE x survey interaction                         | F=0.48 d.f.=3,1156 p=0.70          | F=0.55 d.f.=3,77565 p=0.65         |
| TIPE                                              | F=10.17 d.f.=1,435 p=0.002         | F=9.76 d.f.=1,1399 p=0.002         |
| Mean TIPE minus non-TIPE                          | 1.4 (95%CI 0.6 to 2.3)<br>p=0.002  | 1.4 (95%CI 0.5 to 2.2)<br>p=0.002  |
| TIPE minus non-TIPE at graduation                 | 1.9 (95%CI 0.8 to 3.0)<br>p=0.001  | 1.9 (95%CI 0.8 to 3.0)<br>p=0.0009 |
| TIPE minus non-TIPE at one year postgraduation    | 1.4 (95%CI 0.2 to 2.6)<br>p=0.024  | 1.2 (95%CI 0.1 to 2.4)<br>p=0.039  |
| TIPE minus non-TIPE at two years postgraduation   | 1.3 (95%CI 0.1 to 2.5)<br>p=0.032  | 1.3 (95%CI 0.1 to 2.5)<br>p=0.029  |
| TIPE minus non-TIPE at three years postgraduation | 1.1 (95%CI -0.1 to 2.4)<br>p=0.070 | 1.1 (95%CI -0.1 to 2.3)<br>p=0.078 |

TIPE, Tairāwhiti Interprofessional Education programme

**Table S11. Teams Skill Scale scores: collected data and multiple imputation including variables in the analysis model and demographic variables**

|                                                   | Collected data                     | Multiple imputation                |
|---------------------------------------------------|------------------------------------|------------------------------------|
| Number of Observations Used                       | 1593                               | 2292                               |
| Survey                                            | F=8.91 d.f.=3,1134<br>p<0.0001     | F=7.25 d.f.=3,24563<br>p<0.0001    |
| TIPE x survey interaction                         | F=2.78 d.f.=3,1134 p=0.040         | F=2.05 d.f.=3,66695 p=0.10         |
| TIPE                                              | F=4.05 d.f.=1,431 p=0.045          | F=4.67 d.f.=1,1448 p=0.031         |
| Mean TIPE minus non-TIPE                          | 1.7 (95%CI 0.0 to 3.3)<br>p=0.045  | 1.7 (95%CI 0.2 to 3.3)<br>p=0.031  |
| TIPE minus non-TIPE at graduation                 | 3.5 (95%CI 1.5 to 5.5)<br>p=0.0008 | 3.3 (95%CI 1.3 to 5.2)<br>p=0.0010 |
| TIPE minus non-TIPE at one year postgraduation    | 0.5 (95%CI -1.6 to 2.6)<br>p=0.64  | 0.7 (95%CI -1.3 to 2.8) p=0.49     |
| TIPE minus non-TIPE at two years postgraduation   | 1.4 (95%CI -0.7 to 3.5)<br>p=0.20  | 1.4 (95%CI -0.7 to 3.5) p=0.18     |
| TIPE minus non-TIPE at three years postgraduation | 1.3 (95%CI -0.8 to 3.5)<br>p=0.22  | 1.6 (95%CI -0.5 to 3.7) p=0.14     |

Adjusted for baseline TSS, baseline ATHCTS, discipline, gender, age, ethnicity, and previous location

TIPE, Tairāwhiti Interprofessional Education programme

## Supplementary 5: Additional verbatim examples of themes derived from free-text comments made after completing Attitude to Health Care Teams and Teams Skills Scales

Darlow, B., Brown, M., McKinlay, E., Gray, L., Purdie, G., Pullon, S. (2022). Longitudinal impact of pre-registration interprofessional education on the attitudes and skills of health professionals during their early careers: a non-randomised trial with 4-year outcomes. *BMJ Open*

| Interprofessional teamwork – attitudes and experiences                                                                                   | Examples (TIPE and non-TIPE)                                                                                                                                                                                                                                                                                                                                                                                                                                                                                                                                                                                                                                                                                                                                                                                     |
|------------------------------------------------------------------------------------------------------------------------------------------|------------------------------------------------------------------------------------------------------------------------------------------------------------------------------------------------------------------------------------------------------------------------------------------------------------------------------------------------------------------------------------------------------------------------------------------------------------------------------------------------------------------------------------------------------------------------------------------------------------------------------------------------------------------------------------------------------------------------------------------------------------------------------------------------------------------|
| Benefits of interprofessional teams or collaboration                                                                                     | <p>[Teamwork] is really good and important. Not taught enough about it in Med school. -Survey 4, non-TIPE, Medicine, #8376</p> <p>On [the] whole very beneficial. -Survey 3, TIPE, Pharmacy, #6844</p> <p>I really enjoying working with a variety of disciplines, it has helped me see patient care in a broader perspective. I have also gained valuable skills and extended my assessment skills to recognise when other MDT members input is required. -Survey 3, TIPE, Nursing #0014</p> <p>Love it!! [Teamwork is] such an incredible way to collaborate and integrate ideas. It strengthens relationships and improves overall treatment quality and success. -Survey 5, TIPE, Physiotherapy, #2205</p> <p>[Teamwork is] excellent and essential in palliative care. -Survey 5, TIPE, Medicine, #0135</p> |
| <ul style="list-style-type: none"> <li>• <i>Enjoyable or positive</i></li> </ul>                                                         | <p>I love team work and working with other clinicians, you have so much to learn from them, it is a morale booster. -Survey 3, non-TIPE, Occupational Therapy, #2274</p>                                                                                                                                                                                                                                                                                                                                                                                                                                                                                                                                                                                                                                         |
| <ul style="list-style-type: none"> <li>• <i>Others' expert perspectives, support, learning</i></li> </ul>                                | <p>I find working as a collaborative team is very successful and important for the patient. They receive better care if it comes from a team who have good communication to ensure everyone works together. -Survey 4, TIPE, Pharmacy, #3922</p> <p>[TIPE] has influenced me to look for workplaces where interprofessionalism is present as it demonstrated why it is so important for a patient's health outcomes. -Survey 3, TIPE, Oral Health, #2830</p>                                                                                                                                                                                                                                                                                                                                                     |
| Challenges of interprofessional teams or collaboration                                                                                   | <p>It can be a challenging but very rewarding part of your role in hospital. - Survey 5, non-TIPE, Dietetics, #3590</p> <p>In rehab it is excellent as we are all on the same page. In medical, although we are supposed to be an IDT, other health professionals often go behind the wider MDT's back and organise what they think is best, not what the patient and the rest of the team think is best. -Survey 5, TIPE, Occupational Therapy, #4455</p>                                                                                                                                                                                                                                                                                                                                                       |
| <ul style="list-style-type: none"> <li>• <i>Not on the same page, role/input not understood or valued</i></li> </ul>                     | <p>At times it can be very difficult when other members of the team don't value your opinion. -Survey 3, TIPE, Nursing, #0258</p> <p>I feel on the acute wards, there is still often a divide between medical and allied health staff. Where there should be a more team feel and trust in each other's clinical judgment. Often there is still a battle to be heard and listened to. -Survey 4, TIPE, Physiotherapy, #7271</p>                                                                                                                                                                                                                                                                                                                                                                                  |
| <ul style="list-style-type: none"> <li>• <i>Inefficient, inconvenient e.g. time pressures, paperwork</i></li> </ul>                      | <p>Satisfying and effective cooperation from those at the "coalface", frustration from admin side. - Survey 5, TIPE, Dentistry, #4926</p>                                                                                                                                                                                                                                                                                                                                                                                                                                                                                                                                                                                                                                                                        |
| <ul style="list-style-type: none"> <li>• <i>Hard to communicate e.g. availability, staffing issues, incompatible software</i></li> </ul> | <p>I've found it hard to communicate with other disciplines (aside from GP) as they're usually based at the hospital - the communication software they use is different from the ones used in my current private practice. Getting a hold of them via email or phone calls often result in a long series of voice messages. -Survey 5, TIPE, Physiotherapy, #8880</p> <p>Our job as pharmacists would be much easier if there was a clear line of communication with GPs... There is such little time in community for multidisciplinary meetings and discussions, and until there is funding for this input, businesses simply could not afford to hire more pharmacists to fill these roles. -Survey 3, non-TIPE, Pharmacy, #2872</p>                                                                          |
| Interprofessional interaction outside of formal team                                                                                     | <p>Limited opportunities with regards to true interdisciplinary discussion... [but] I am more confident now in talking to patients and explaining long term care and concerns as well as speaking to GPs and pharmacist with regards to medical and drug histories. -Survey 5, TIPE, Dentistry, #3243</p> <p>It is difficult when you are working in isolation in a location as a dietitian. MDT meetings don't happen at our PHO - something I would like more of. -Survey 5, non-TIPE, Dietitian, #6653</p>                                                                                                                                                                                                                                                                                                    |

TIPE = Tairāwhiti Interprofessional Education program; MDT = multi-disciplinary team; IDT = inter-disciplinary team; GP = general practitioner; PHO = primary health organisation

## Supplementary 6: Verbatim examples of themes derived from free-text comments made by Tairāwhiti Interprofessional Education programme graduates about influence of pre-registration training on their professional practice

Darlow, B., Brown, M., McKinlay, E., Gray, L., Purdie, G., Pullon, S. (2022). Longitudinal impact of pre-registration interprofessional education on the attitudes and skills of health professionals during their early careers: a non-randomised trial with 4-year outcomes. *BMJ Open*

| Influence of pre-registration training on preparation for workforce and TIPE on career* | Number of comments**             |                                   |                                     | Example (TIPE)                                                                                                                                                                                                                                                                                             |
|-----------------------------------------------------------------------------------------|----------------------------------|-----------------------------------|-------------------------------------|------------------------------------------------------------------------------------------------------------------------------------------------------------------------------------------------------------------------------------------------------------------------------------------------------------|
|                                                                                         | One year post-graduation (n=113) | Two years post-graduation (n=111) | Three years post-graduation (n=114) |                                                                                                                                                                                                                                                                                                            |
| <b>Participated in an IPE course</b>                                                    | <b>102</b>                       | <b>90</b>                         | <b>93</b>                           | TIPE program in Gisborne. -Survey 3, Oral Health, #5620                                                                                                                                                                                                                                                    |
| • <i>TIPE helpful</i>                                                                   | 34                               | 21                                | 32                                  | The TIPE programme in Gisborne was THE BEST experience that set me up to work interprofessionally as a student. Before that we hardly touched on it. I think everyone needs to be doing this!! -Survey 3, Physiotherapy, #7271                                                                             |
| <b>The way I do my job</b>                                                              | <b>102</b>                       | <b>87</b>                         | <b>83</b>                           | I don't think TIPE has had much, if any, influence on my career choice (to be a radiologist) but it certainly has influenced how I practise in my role as a junior doctor. -Survey 3, Medicine, #479                                                                                                       |
| • <i>Understand others' roles/perspectives</i>                                          | 17                               | 16                                | 6                                   | [TIPE] made me appreciate the roles of others and value their input. -Survey 5, Nursing, #0077                                                                                                                                                                                                             |
| • <i>Connecting with other health professionals</i>                                     | 48                               | 30                                | 43                                  | [TIPE] encouraged me to be more assertive and reach out to other health professionals first to initiate an interprofessional team approach for a patient when I feel it is appropriate. - Survey 3, Physiotherapy, #8880                                                                                   |
| • <i>Collaborating to prioritise patient wellbeing</i>                                  | 15                               | 10                                | 7                                   | [TIPE] has been an awesome program, as I now think of patients' wellbeing as a whole, rather than focusing on what my profession does. I know that I can liaise with GPs or other health professionals if I need to for the best treatment outcome and benefit of the patient. -Survey 3, Dentistry, #8826 |
| • <i>Thriving in interprofessional teams</i>                                            | 15                               | 15                                | 16                                  | [TIPE] has made me more open to dealing with people and professions who may not share the same view, and working out how we can make things work with the goal of the client in mind. -Survey 3, Occupational Therapy, #3643                                                                               |
| • <i>Hit the ground running</i>                                                         | 4                                | 5                                 | 5                                   | [TIPE] allowed me to hit the ground running when I began my role in the hospital. -Survey 3, Pharmacy, #7374                                                                                                                                                                                               |
| • <i>Interprofessional champions</i>                                                    | 0                                | 2                                 | 1                                   | I am an advocate for more multi-disciplinary discourse in our pharmacy chain. -Survey 4, Pharmacy, #3878                                                                                                                                                                                                   |
| <b>No perceived influence</b>                                                           | <b>22</b>                        | <b>14</b>                         | <b>24</b>                           | It hasn't, since there are hardly any jobs for dietitians. You just take what you can get. -Survey 3, Dietetics, #4766                                                                                                                                                                                     |

TIPE = Tairāwhiti Interprofessional Education programme; IPE = interprofessional education; GP = General Practitioner

\* Two additional themes, related to influence on geographical location and clinical setting, are reported in a separate paper

\*\* Participants could make more than one free-text comment within an item response.
